# Supplementary material for: Tissue-specific alteration of gene expression and function by RU486 and the GeneSwitch system
Source: PubMed Central journal article supplement (PMC6529481; doi:10.1038/s41514-019-0036-8), 2019-05-21
Supplement: 41514_2019_36_MOESM1_ESM.pdf [file 41514_2019_36_MOESM1_ESM.pdf]

**SUPPLEMENTARY INFORMATION (Robles-Murguia et al.)**

**Tissue-specific alteration of gene expression and function by RU486 and the GeneSwitch system**

## SUPPLEMENTARY FIGURES

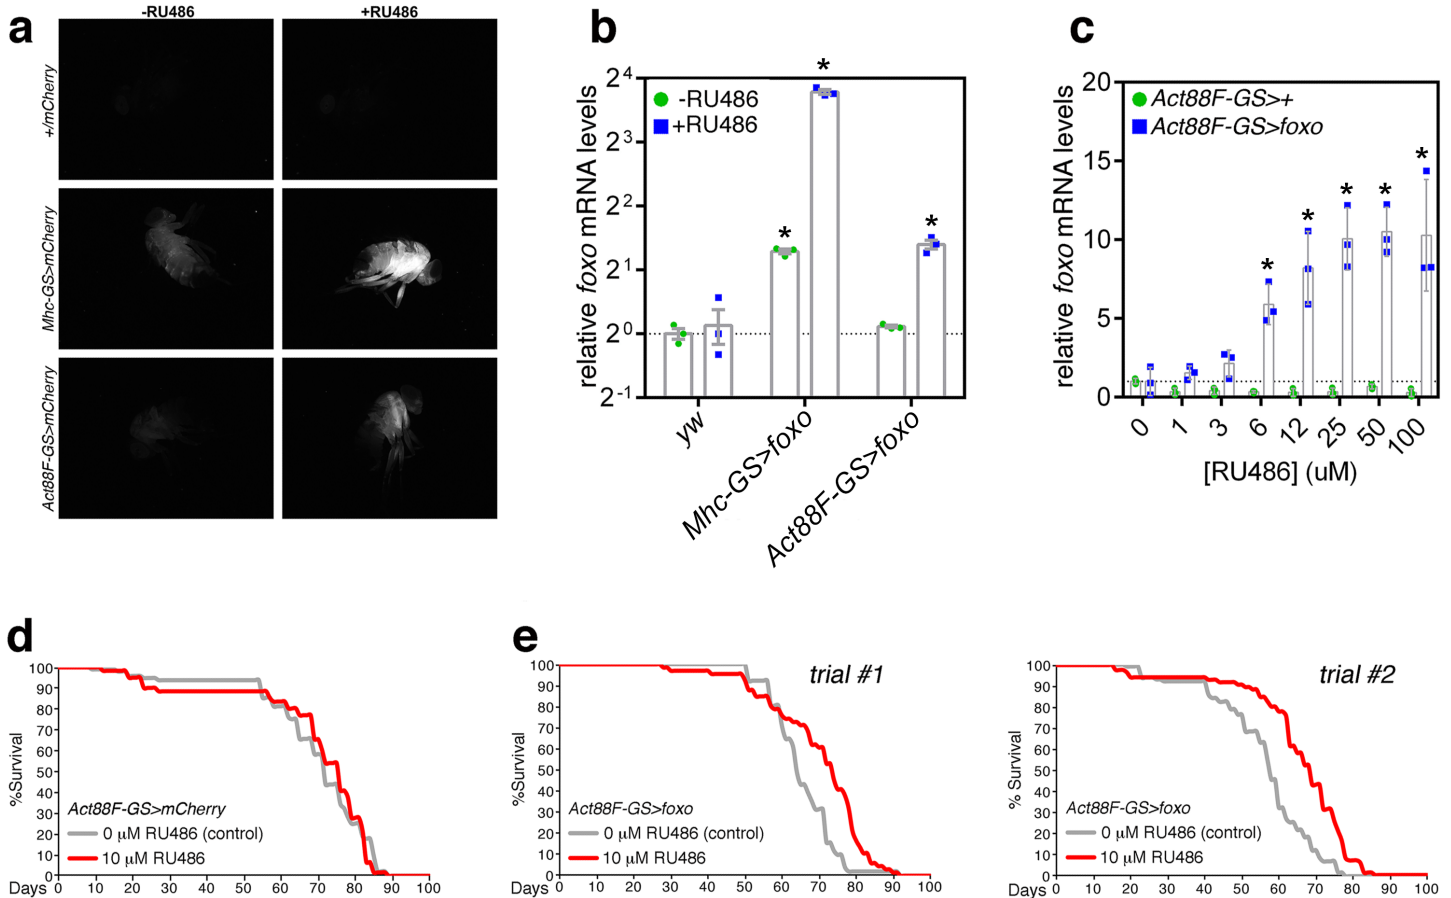

**Supplementary Figure 1.** Characterization of the *Act88F-GS-Gal4* driver for drug-induced transgenic expression in *Drosophila*. **a** Compared to the *Mhc-GS-Gal4*, which is leaky<sup>1</sup>, *Act88F-GS-Gal4* drives expression of *mCherry* transgenes only in presence of RU486 but not in its absence. As inferred from the fluorescence of *mCherry* transgenes, *Act88F-GS-Gal4* drives transgenic expression specifically in thoracic flight muscles and to a lesser extent in leg muscles. No expression is detected in non-muscle tissues. **b** Consistently, *foxo* expression is induced by *Act88F-GS-Gal4* only in presence of RU486 but not in its absence, whereas leaky *foxo* expression occurs with *Mhc-GS-Gal4* even in the absence of RU486. **c** Transgenic *foxo* expression with *Act88F-GS-Gal4* is dose-dependent. In **b-c**,  $n=3$  and the error bars represent the SD.

**d** *mCherry* expression induced with 10  $\mu$ M RU486 and *Act88F-GS-Gal4* does not extend lifespan ( $P=0.25$ ;  $n[\text{control}]=72$  and  $n[\text{RU486}]=76$ ). **e** RU486-induced overexpression of wild-type *foxo* with *Act88F-GS-Gal4* significantly extends lifespan (trial #1:  $P=0.0014$ ;  $n[\text{control}]=64$  and  $n[\text{RU486}]=74$ ); trial #2:  $P<0.0001$ ;  $n[\text{control}]=58$  and  $n[\text{RU486}]=69$ ), consistent with previous results<sup>2</sup>, obtained with a constitutive *Mhc-Gal4* driver.

## SUPPLEMENTARY REFERENCES

- 1 Poirier, L., Shane, A., Zheng, J. & Seroude, L. Characterization of the *Drosophila* gene-switch system in aging studies: a cautionary tale. *Aging Cell* **7**, 758-770, doi:10.1111/j.1474-9726.2008.00421.x (2008).
- 2 Demontis, F. & Perrimon, N. FOXO/4E-BP signaling in *Drosophila* muscles regulates organism-wide proteostasis during aging. *Cell* **143**, 813-825, doi:10.1016/j.cell.2010.10.007 (2010).

## SUPPLEMENTARY TABLES

| Control                   |            |        |            |  |  |
|---------------------------|------------|--------|------------|--|--|
| <i>WT strains</i>         | Non-flyers | Flyers | Percentage |  |  |
| w1118                     | 8          | 109    | 6.84       |  |  |
| B3                        | 2          | 112    | 1.75       |  |  |
| <i>GeneSwitch strains</i> |            |        |            |  |  |
| ACT5C                     | 0          | 66     | 0.00       |  |  |
| WB-FB                     | 0          | 85     | 0.00       |  |  |
| MHC                       | 3          | 59     | 4.84       |  |  |
| ACT88F                    | 5          | 79     | 5.95       |  |  |

  

| 1uM RU486                 |            |        |            |           |              |
|---------------------------|------------|--------|------------|-----------|--------------|
| <i>WT strains</i>         | Non-flyers | Flyers | Percentage | Fisher P= | Chi+Yates P= |
| w1118                     | 8          | 117    | 6.40       | 1.0000    | 0.8911       |
| B3                        | 9          | 130    | 6.47       | 0.1179    | 0.1280       |
| <i>GeneSwitch strains</i> |            |        |            |           |              |
| ACT5C                     | 4          | 60     | 6.25       | 0.0559    | 0.1199       |
| WB-FB                     | 4          | 92     | 4.17       | 0.1236    | 0.1626       |
| MHC                       | 2          | 48     | 4.00       | 1.0000    | 0.8308       |
| ACT88F                    | 61         | 8      | 88.41      | 0.0001    | 0.0001       |

  

| 10uM RU486                |            |        |            |           |              |
|---------------------------|------------|--------|------------|-----------|--------------|
| <i>WT strains</i>         | Non-flyers | Flyers | Percentage | Fisher P= | Chi+Yates P= |
| w1118                     | 14         | 135    | 9.40       | 0.5076    | 0.5977       |
| B3                        | 6          | 103    | 5.50       | 0.1636    | 0.2522       |
| <i>GeneSwitch strains</i> |            |        |            |           |              |
| ACT5C                     | 6          | 56     | 9.68       | 0.0113    | 0.0300       |
| WB-FB                     | 1          | 87     | 1.14       | 1.0000    | 0.3243       |
| MHC                       | 11         | 58     | 15.94      | 0.0492    | 0.0766       |
| ACT88F                    | 73         | 5      | 93.59      | 0.0001    | 0.0001       |

  

| 100uM RU486               |            |        |            |           |              |
|---------------------------|------------|--------|------------|-----------|--------------|
| <i>WT strains</i>         | Non-flyers | Flyers | Percentage | Fisher P= | Chi+Yates P= |
| w1118                     | 23         | 116    | 16.55      | 0.0207    | 0.0293       |
| B3                        | 3          | 138    | 2.13       | 1.0000    | 0.8307       |
| <i>GeneSwitch strains</i> |            |        |            |           |              |
| ACT5C                     | 4          | 61     | 6.15       | 0.0578    | 0.1238       |
| WB-FB                     | 2          | 89     | 2.20       | 0.4977    | 0.5073       |
| MHC                       | 33         | 42     | 44.00      | 0.0001    | 0.0001       |
| ACT88F                    | 76         | 5      | 93.83      | 0.0001    | 0.0001       |

**Supplementary Table 1.** Statistical analysis of flight assays.
